# Supplementary material
Source: PubMed Central journal article supplement (PMC4166425)
Supplement: NIHMS403739-supplement-1.pdf [file NIHMS403739-supplement-1.pdf]

**Supplementary Table 1.** Relations of MVPA measures to Risk Factors, adjusted for BMI

|                          | Total MVPA*      |         |  | MVPA <sub>10+</sub> † |         | MVPA <sub>&lt;10</sub> ‡ |         |  |
|--------------------------|------------------|---------|--|-----------------------|---------|--------------------------|---------|--|
|                          | Beta coeff. (SE) | P value |  | Beta coeff. (SE)      | P value | Beta coeff. (SE)         | P value |  |
| Triglycerides, mg/dl     | -2.8 (0.69)      | <0.0001 |  | -2.0 ( 1.13)          | 0.08    | -3.6 (1.1)               | 0.001   |  |
| HDL, mg/dl               | 0.81 (0.17)      | <0.0001 |  | 1.05 (0.32)           | 0.001   | 0.60 (0.25)              | 0.02    |  |
| Framingham risk score, % | -0.14 (0.04)     | 0.001   |  | -0.3 (0.07)           | 0.70    | -0.24 (0.06)             | 0.0001  |  |
| Waist circumference, cm  | -0.15 (0.06)     | 0.009   |  | -0.13 (0.09)          | 0.16    | -0.17 (0.09)             | 0.06    |  |

Betas and odds ratios are presented per 10 minutes/day of MVPA.

\* adjusted for age, sex, accelerometer wear time (avg/day), education level, self-reported general health and BMI

† adjusted for age, sex, accelerometer wear time (avg/day), education level, self-reported general health, MVPA<sub><10</sub>, and BMI

‡ adjusted for age, sex, accelerometer wear time (avg/day), education level, self-reported general health, MVPA<sub>10+</sub>, and BMI

**Supplementary Table 2.** Relations of MVPA measures to Risk Factors, by sex

| Men (n=959)              | Total MVPA*            |         | MVPA <sub>10+</sub>    |         | MVPA <sub>&lt;10</sub> †‡ |         |
|--------------------------|------------------------|---------|------------------------|---------|---------------------------|---------|
|                          | Beta coeff. (SE)       | P value | Beta coeff. (SE)       | P value | Beta coeff. (SE)          | P value |
| HDL, mg/dl               | 0.74 (0.22)            | 0.009   | 0.88 (0.62)            | 0.16    | 0.66 (0.30)               | 0.03    |
| Framingham risk score, % | -0.26 (0.08)           | 0.001   | -0.22 (0.16)           | 0.17    | -0.28 (0.09)              | 0.002   |
| Waist circumference, cm  | -0.46 (0.18)           | 0.010   | -0.55 (0.34)           | 0.10    | -0.40 (0.24)              | 0.10    |
| BMI, kg/m <sup>2</sup>   | -0.14 (0.07)           | 0.05    | -0.18 (0.12)           | 0.14    | -0.12 (0.11)              | 0.26    |
|                          | Odds Ratio<br>(95% CI) | P value | Odds Ratio<br>(95% CI) | P value | Odds Ratio<br>(95% CI)    | P value |
| Obesity                  | 0.92 (0.85-1.00)       | 0.05    | 0.95 (0.82-1.10)       | 0.51    | 0.91 (0.82-1.008)         | 0.07    |

  

| WOMEN (n=1150)           | Beta coeff. (SE)       | P value | Beta coeff. (SE)       | P value | Beta coeff. (SE)       | P value |
|--------------------------|------------------------|---------|------------------------|---------|------------------------|---------|
| HDL, mg/dl               | 1.54 (0.30)            | <0.0001 | 1.71 (0.40)            | <0.0001 | 1.28 (0.51)            | 0.13    |
| Framingham risk score, % | -0. (0.03)             | 0.001   | -0.09 (0.04)           | 0.02    | -0.15 (0.06)           | 0.01    |
| Waist circumference, cm  | -1.5 (0.21)            | <0.0001 | -1.34 (0.30)           | <0.0001 | -1.80 (0.39)           | <0.0001 |
| BMI, kg/m <sup>2</sup>   | -0.60 (0.07)           | <0.0001 | -0.53 (0.09)           | <0.0001 | -0.70 (0.13)           | <0.0001 |
|                          | Odds Ratio<br>(95% CI) | P value | Odds Ratio<br>(95% CI) | P value | Odds Ratio<br>(95% CI) | P value |
| Obesity                  | 0.73 (0.65-0.81)       | <0.0001 | 0.73 (0.61-0.88)       | 0.001   | 0.73 (0.61-0.87)       | 0.001   |

Betas and odds ratios are presented per 10 minutes/day of MVPA.

\* adjusted for age, sex, accelerometer wear time (avg/day), education level and self-reported general health

† adjusted for age, sex, accelerometer wear time (avg/day), education level, self-reported general health and MVPA<sub><10</sub>

‡ adjusted for age, sex, accelerometer wear time (avg/day), education level, self-reported general health and MVPA<sub>10+</sub>
